# Supplementary material for: Unsupervised classification of vertical profiles of dual polarization radar variables
Source: Copernicus journal article supplement (doi:10.5194/amt-2019-307), 2019-08-20
Supplement: Supplementary file [file amt-2019-307-AC2-supplement.pdf]

# Revision and response to Anonymous Referee 2

## Major comments

The first major comment I have relates to producing separate classification methods for profiles with rain at the surface and profiles with snow at the surface. If the goal of this study is to identify ice microphysical processes from radar observations, it is unclear why similar processes occurring above the melting layer (for stratiform precipitation) should be identified separately from those some processes occurring in precipitation that happens to be snow at the surface. The authors have not demonstrated that ice growth in situations with rain at the surface is any different than ice growth with snow at the surface, other than the potential for increased aggregation just above the melting layer.

By having separate classification based on surface precipitation type we do not intend to suggest that there is a fundamental difference in ice growth linked to the surface precipitation type. The reasons for separate processing are more technical. The most important reason is the difference in preprocessing. Because of the conditional truncation based on the occurrence of ML, there is a major difference in what the height represents in the profiles: either it is true altitude from the surface (S-model) or the distance from the ML (R-model). We are hesitant to mix the truncated and non-truncated profiles in the clustering phase fearing that the differences rising from the different preprocessing could drive the clustering.

Having separate methods brings some added complexity to the methodology. However, it does not prevent a holistic, all season analysis of the ice processes. Similar classes within and between the two classification models can be grouped as suggested in Section 5, where we introduce the class archetypes.

We didn't expect major seasonal differences in ice process fingerprints. However, we demonstrate a clear seasonal difference in KDP.

The second major comment I have is that the echo-top or cloud-top temperature of the profiles is more important to the ice growth processes (and is relevant in systems with either rain or snow at the surface) than the surface temperature. In fact, the presence of an inversion (found by the

authors to be a common feature in their observed cases) could bias the clustering since the growth processes at upper levels of the atmosphere above the inversion have little relation to what is going on at the low levels. Having clusters essentially trained with a climatological lapse rate could then mistakenly assign profiles into the wrong growth regime if there is a strong deviation from the climatological temperature profiles during certain types of events. Some discussion of this point is warranted.

The goal of this study is to see if unsupervised classification can be used to document the characteristic profiles corresponding to snow growth processes. The answer to this seems to be yes, since we were able to identify such previously undocumented features as snow processes in inversion layers. Using the cloud top temperature, on the other hand, would not allow to diagnose such phenomena in the inversion layers.

It would be possible to use the whole temperature profiles as a classification feature, which might allow more accurate separation of the processes to different classes. This should be investigated in a future study.

We added discussion on this in Section 5.

## Minor comments

Line 70: Add a description of the spatial and temporal resolution of the GDAS data.

Added.

Line 75: Clarify which radar variables have their medians calculated in linear space and why this is being done; add reference if necessary.

The mention of “linear space” here was a deprecated remnant from an earlier draft of the manuscript, where we had used means instead of medians. This mention is now removed, as a medians taken in dB and linear space are equal.

Line 79: Does the method of KDP estimation impact the results? Add some discussion here of why this method was chosen for this study.

Essentially, the drawback of this method is the inability to produce negative KDP. However, negative KDP is not relevant for this study, as now explained in the revised text.

Line 100: How robust is the melting layer detection algorithm used by the authors if it requires the 4200-m threshold to limit detected peaks above this altitude. Some further discussion is needed here.

We added a paragraph discussing the motivation for the thresholds used in steps 2. and 3.

Line 104: Unsure what the sentence means, please clarify.

This sentence has been reworded. Further, we added the definition of peak prominence and a reference to the implementation of the peak detection algorithm used.

Lines 113-120: How much information does the surface temperature contain about the ice growth processes aloft? The authors should demonstrate that this surface temperature is a necessary component of the classification algorithm that improves its performance. A comparison between the clustering with the surface temperature and without the surface temperature, or similar test, would be informative.

With the use of surface temperature as a classification feature, we show that KDP signatures occur near the surface in strong inversion layers in temperatures favored by dendritic growth as manifested in class S13. The use of surface temperature is necessary to distinguish this from the fingerprints of the H-M process. This is now discussed in better detail in Section 5.

Lines 133-135: Discuss how the PCA is performed for profiles with different numbers of bins. For example, when truncated data above the melting layer, the melting layer top will have different heights for different cases, resulting in profiles with non-uniform bins.

The numbers of bins are always 588 and 582 for profiles in snow and rain events, respectively. We made edits to Sections 2.1, 2.2.1 and 3.1 to better explain this. Please note that for rain events, the highest bin is 10 km above the ML top rather than at 10 km altitude. So, precisely speaking, we are rather shifting the observation windows of the profiles than truncating them. We feel, however, that “truncation” is an appropriate term to describe what this effectively does, as echo tops are usually lower than the ML top height + 10 km.

Lines 138-140: How were these standardization ranges chosen? Some of the upper bounds on these ranges such as for KDP and ZDR seem like they could be exceeded for C-band radar observations in certain conditions. Please discuss this further.

Added a sentence here: “The values of the standardized variables are not capped, but values greater than 1 are allowed when the unscaled values exceed b.”

Line 148: Show a plot of the first principle components to provide a physical intuition of what these components represent. Also, the need for 30 principle components implies that adequately reducing the dimensionality of the radar observations is difficult. Explain how PCA is better than simply sampling the radar variables at various heights.

There are several incentives for using PCA over sampling some of which are now discussed in the revised manuscript. We expect that the total number of samples needed would be even higher than 30 (=10 per radar variable). PCA

also optimizes the weights of the components for clustering, since the variance of each component reflects how much variance they explain in the original data.

The first components are show in Figure 1 below.

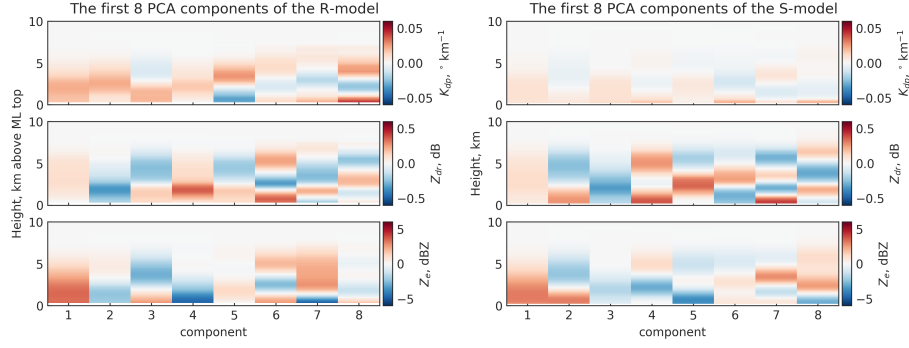

Figure 1: The first PCA components of R- and S-models

Lines 187-188: The description of the cluster convergence test here is unclear. Please clarify.

We made a small clarification here. The convergence of the clustering solutions can be analyzed by simply comparing the cluster centroids of each repetition of the clustering process.

Lines 198-199: Are different clusters with similar profile shapes but with different magnitudes unique fingerprints of microphysical processes?

We don't consider them unique fingerprints. This is why they are here termed trivial differences. We added a sentence in this paragraph to highlight the goal of evaluating the differences.

Lines 210-211: Do the authors have a specific application in mind when choosing the number of clusters to use in their study? Please discuss.

Good point. We now mention here our objective of separating the main profile characteristics and the process fingerprints to individual classes.

Line 216: "The order of components..." rather than "The component"?

Here we are referring to the value of the first principal component. In PCA, the principal components are by definition ordered in the decreasing order of their variance (and the explained variability in the original data). We made some rephrasing in this paragraph to avoid confusion between the concepts of a principal component and a profile class.

Line 221: It may be more accurate to call this relation between peak ZDR and KDP and offset rather than an anticorrelation.

In this paragraph we are discussing the high values of ZDR and KDP (and their association to echo top height) rather than the altitudes where those values occur. The beginning of the paragraph is rephrased to avoid confusion.

Figure 2: For cluster R3, the ZDR seems quite high so close to the melting layer. Please add some further discussion about this signature.

Discussion on this feature can be found in the the paragraph starting from the line 253 in the first revision of the discussion paper. We made small edits to the paragraph to point the reader to Fig. 3 to highlight the finding that this signature is strongly linked to the echo top being in the DGL.

Line 234: Refer to figures in order; here, figures 7 and 8 are referred to before figures 5 and 6.

Added a note that Figs. 7 and 8 are introduced later. Here we simply note the reader that two different KDP ranges are used in the figures.

Line 235: Add some discussion here about whether polarimetric signatures of convection such as KDP and ZDR columns may be present in the radar observations, and therefore reflected in the classes.

Added.

Figure 3: Some of the classes are quite similar to each other (e.g., S9 and S10) to the point that it would be difficult to argue that they represent any unique fingerprints and instead reflect natural variability of the same microphysical process.

Some classes are indeed quite similar. With surface temperature as an additional clustering feature this is difficult to avoid. The mentioned S9 and S10 highlight this characteristic of the method, since the only significant difference between them seems to be the surface temperature. In the initial revision, we discuss similarities and combining classes in section 5, but indeed we should mention this consideration already much earlier in the paper. We added a paragraph about this in the end of Section 3.3.

Lines 242-243: KDP values of 0.02 degrees/km and 0.04 degrees/km are both relatively low; please discuss further how this variable meaningfully separates the R0-3 and R4-5 classes. Also, what does the subscript “c” indicate with respect to the radar variables (found here and later instances)?

In this paragraph we discuss the KDP related characteristics of each class. However, as pointed out in Sections 2 and 3, the classification is based on not only profiles of KDP, but also ZDR, and Z. Hence, the classes are not required to have unique characteristics in KDP, but rather in the combination of the three

variables. These other characteristics are also discussed in this section. We have rewritten this paragraph to improve its readability, explaining also the subscript “c”, which is used for referring to cluster centroid values instead of the measured values in individual profiles.

Figure 5: Explain why the ZDR centroid curve doesn’t correspond to the profiles (i.e., shaded region) above 6 km.

By following the shaded areas, we see that at least 75 % of the profiles in class S13 have echo tops lower than 7 km. However, there are some profiles with higher echo tops. Many of those profiles have considerable values of ZDR above the 7 km altitude, and thus the class centroid has values above zero. We would see a similar mismatch if we would make a comparison between the quantiles and the mean.

Line 245: How common is it for precipitation systems in this region to have moist adiabatic lapse rates?

Moist adiabatic lapse rate was used here as the first approximation to give the reader a rough idea of the ambient temperatures around the peak KDP height of the R6 and R9 profiles. For a better estimate, and to be consistent with the rest of the manuscript, we now give the class mean of NCEP GDAS value at the peak centroid KDP altitude in the rewritten paragraph.

Lines 251-252: How do the authors separate out the contributions to KDP of planar crystals generated aloft and sedimenting from the KDP produced by secondary ice from the Hallett-Mossop process?

For a single profile, it is difficult to do such separation. Class centroids, on the other hand, represent statistical features of the member profiles. A slightly bimodal centroid KDP with peaks corresponding to DGL and H-M, for example, is a very likely indicator of the contribution of the H-M process. This is now mentioned a couple of paragraphs down where classes R7 and S12 are discussed.

Lines 272-274: The maximum KDP values for the S14 class are much smaller than those for the S15 class, and the heights of the maximum ZDR values between these classes are also different. Discuss how these different profiles can both indicate a similar fingerprint of dendritic growth.

We added a couple of sentences here discussing the differences and the likely reasons behind them.

Line 283: Clarify here whether both processes are occurring within the same profile but at different heights or there are dendrites that have fallen into the Hallett-Mossop region where that process is also ongoing.

This is now clarified as mentioned in an answer above.

Line 300: Add the color scale indicating the classes to figures 7 and 8.

Added.

Figure 7: Explanation for negative ZDR just above melting layer?

Unfortunately we have no explanation for this. We frequently observe a similar dip in ZDR just above the melting layer, but we have not studied this further. There is a possibility of a small calibration bias which could explain why the lowest values are slightly negative instead of closer to zero.

Figure 8: The ZDR profiles for this case appear fairly noisy. It might be helpful to show an RHI for this case, especially from the early portion of the event, to understand how much of the variability in the ZDR profiles is due to noise in the actual radar data.

The RHI of ZDR, as shown in the attached Figure 2, has heavy noise in the upper part. The ZDR indeed still looks rather noisy even after total averaging range of 2 km used in this study.

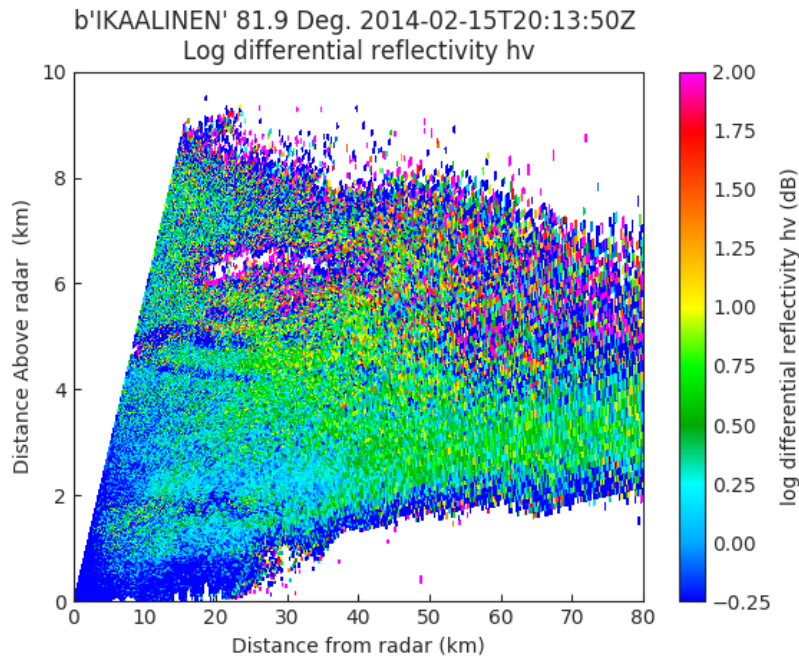

Figure 2: RHI of ZDR. Hyytiälä measurement station is at 64 km.

Line 371: If these archetypes represent the desired output of the classification algorithm, doesn't this imply that the number of clusters (10 and 16) used in the classification algorithm is too high? Why not use 7 clusters in the algorithm?

This is now discussed in Section 5 in the revised manuscript.

Line 389: It would be beneficial to add some discussion here of the potential to identify the process of heavy riming, where ZDR values may become negative, as well as some indication of how common this process is in Southern Finland.

Added.

## Other corrections

On lines 335-336 of the first version of the discussion paper, the numbers of events manually classified as either stratiform or convective were wrong. These numbers reflected a different way of separating individual events which was used in an earlier draft of the manuscript. The numbers have now been corrected to reflect the current definition of individual events stated on lines 240-241 of the first discussion version.



# Unsupervised classification of vertical profiles of dual polarization radar variables

Jussi Tiira<sup>1</sup> and Dmitri N. Moisseev<sup>1,2</sup>

<sup>1</sup>Institute for Atmospheric and Earth System Research / Physics, Faculty of Science, University of Helsinki, Helsinki, Finland

<sup>2</sup>Finnish Meteorological Institute, Helsinki, Finland

**Correspondence:** Jussi Tiira (jussi.tiira@helsinki.fi)

**Abstract.** Vertical profiles of polarimetric radar variables can be used to identify fingerprints of snow growth processes. In order to systematically study such manifestations of precipitation processes, we have developed an unsupervised classification method. The method is based on  $k$ -means clustering of vertical profiles of polarimetric radar variables, namely reflectivity, differential reflectivity and specific differential phase. For rain events, the classification is applied to radar profiles truncated at the melting layer top. For the snowfall cases, the surface air temperature is used as an additional input parameter. The proposed unsupervised classification was applied to 3.5 years of data collected by the Finnish Meteorological Institute Ikaalinen radar. The vertical profiles of radar variables were computed above the University of Helsinki Hyytiälä station, located 64 km east of the radar. Using these data, we show that the profiles of radar variables can be grouped into 10 and 16 classes for rainfall and snowfall events respectively. These classes seem to capture most important snow growth and ice cloud processes. Using this classification, main features of the precipitation formation processes, as observed in Finland, are presented.

## 1 Introduction

Globally, majority of precipitation both during winter and summer originates from ice clouds (Field and Heymsfield, 2015). At higher latitudes winter precipitation occurs in the form of snow, which can have a dramatic impact on human life (Juga et al., 2012). There are a number of challenges in remote sensing of winter precipitation or ice clouds, i.e. quantitative estimation of ice water content or precipitation rate (von Lerber et al., 2017), identification of dangerous weather conditions, etc. To address these challenges, advances in identifying and documenting the processes that take place in ice clouds are needed.

There are several pathways by which ice particles grow, such as vapor deposition, aggregation and riming. Occurrence of these processes depends on environmental conditions. Interpretation of radar observations is based on our understanding of the link between microphysical and scattering properties of hydrometeors. By identifying particle types in observations, we may conclude what processes took place. Currently, dual-polarization radar observations are used in fuzzy logic classification to identify dominant hydrometeor type present in a radar volume (e.g. Chandrasekar et al., 2013; Thompson et al., 2014). Such methods work very well for classification of hydrometeors of summer precipitations and some features of winter precipitation types. The main challenge is the lack of distinction in dual-polarization radar variables between some ice particle habits. For example, large low-density aggregates and graupel may have similar radar characteristics. Furthermore, these methods perform

25 classification on radar volume by volume basis, without taking into account surrounding observations. Recently, a modification for the hydrometeor classifiers was proposed to make the algorithms aware of the surrounding by incorporating measurements from neighbouring radar volumes (Bechini and Chandrasekar, 2015; Grazioli et al., 2015b). This step has greatly improved classification robustness, but aims to identify particle types instead of fingerprints of microphysical processes.

In the past 10 years, a number of studies reported signatures of ice growth processes in dual polarization radar observations. Kennedy and Rutledge (2011) have reported bands of increased values of specific differential phase,  $K_{dp}$ , and differential reflectivity,  $Z_{DR}$  in Colorado snow storms. These bands took place at altitudes where ambient air temperature was around -15 °C and their occurrence was attributed to growth of dendritic crystals. Andrić et al. (2013) have implemented a simple steady state single column snow growth model to explain main features of the bands. It was also observed that the occurrence of  $K_{dp}$  bands can be linked to heavier surface precipitation (Kennedy and Rutledge, 2011; Bechini et al., 2013). Moisseev et al. (2015) have advocated that the  $K_{dp}$  bands occur only in precipitation systems with high enough cloud tops heights, where a large number of ice crystals can be generated either by heterogeneous or homogeneous ice nucleation. Using a larger dataset, Griffin et al. (2018) have shown that the  $K_{dp}$  bands can be linked to formation of ice by homogeneous ice nucleation at cloud tops. Furthermore, it was shown that the  $K_{dp}$  bands can be linked to onset of aggregation (Moisseev et al., 2015) which tend to occur more frequent in higher water vapor content environments (Schneebeli et al., 2013). In addition to the above-listed studies different aspects of these bands were presented by Trömel et al. (2014); Oue et al. (2018); Kumjian and Lombardo (2017). Besides  $K_{dp}$  bands in the dendritic growth zone, several studies (e.g. Grazioli et al., 2015a; Sinclair et al., 2016; Kumjian et al., 2016; Giangrande et al., 2016) have reported  $K_{dp}$  observations in the temperature region where Hallett-Mossop (H-M; Hallett and Mossop, 1974) rime splintering secondary ice production takes place (Field et al., 2016). Sinclair et al. (2016) have shown that such observations can be used to test representation of the secondary ice production in numerical weather prediction models. Other dual-polarization observations that show notable features are high  $Z_{DR}$  regions at the top of ice clouds that can be linked to presence of super-cooled liquid water (Williams et al., 2015; Oue et al., 2016) and surrounding the cores of snow generating cells (Kumjian et al., 2014).

As presented above the fingerprints of snow growth processes can occur in the form of bands, either embedded in the precipitation or on top of a cloud, or in the form of generating cells. To identify and document such features, a classification method that uses vertical profiles of dual-polarization radar observations can be used. In this study we have developed such unsupervised classification method based on  $k$ -means clustering of vertical profiles of polarimetric radar variables, namely reflectivity, differential reflectivity and specific differential phase. The proposed classification is applied to 3.5 years of data collected with the Finnish Meteorological Institute Ikaalinen radar.

The paper is structured as follows. Section 2 describes polarimetric radar and temperature data and their preprocessing. The unsupervised classification method is presented in Sect. 3. Section 4 is dedicated for the analysis and interpretation of the classification results and Sect. 5 presents the conclusions.

## 2 Data

In this study, we use vertical profiles of polarimetric radar observables of precipitation over Hyytiälä forestry station in Juupajoki, Finland collected using Ikaalinen weather radar, hereafter IKA. The radar is located 64 km west from the station. The measurements have been performed between January 2014 and May 2017, partly during the Biogenic Aerosols – Effects on Clouds and Climate (BAECC; Petäjä et al., 2016) field campaign which took place at the measurement site in 2014.

The classification training material includes all precipitation events from this period, where ~~after preprocessing~~, after preprocessing, there were no major data quality problems identified. Since synoptic conditions may be similar even in cases where there are gaps in observed precipitation, we define any two precipitation events separate if a continuous gap in reflectivity between them exceeds 12 hours. See Sect. 4 for more discussion. During the observation period, we have identified 74 snow and 123 rain events. Generally, the full temporal extent of an event includes radar profiles in which precipitation have not reached the ground. A list of the precipitation events is given in supplement S1.

In order to link features identified in vertical profiles of radar variables to precipitation processes, information on the ambient temperature is needed. For this purpose we use vertical profiles of temperature from the National Center for Environmental Prediction (NCEP) Global Data Assimilation System (GDAS) output for Hyytiälä interpolated to match the temporal and vertical resolution of the vertical profiles of radar variables used in this study. The original temporal resolution of the NCEP GDAS data over Hyytiälä is 3 hours, and the vertical resolution is 25 hPa between the 1000 and 900 hPa levels, and 50 hPa elsewhere.

### 2.1 Vertical profiles of dual-polarization radar observables

The radar profiles are extracted from IKA C-band radar range height indicator (RHI) measurements. IKA performs RHI scans directly towards Hyytiälä station every 15 minutes. The values of the radar profiles above Hyytiälä are estimated as horizontal medians ~~in linear space~~ over a range of 1 km from the station. The medians are taken over constant altitudes using linear spatial interpolation between ~~rays~~, the rays. The target bin size of the height interpolation is 50 m.

In this investigation, vertical profiles of equivalent reflectivity factor,  $Z_e$ , differential reflectivity,  $Z_{DR}$ , and specific differential phase,  $K_{dp}$  are considered in the classification. The  $K_{dp}$  values were computed using the Maesaka et al. (2012) method as implemented in the Python ARM Radar Toolkit (~~Py-ART~~) (~~Helmus and Collis, 2016~~) (Py-ART; Helmus and Collis, 2016). The method assumes that propagation differential phase,  $\phi_{DP}$ , increases monotonically with increasing range from the radar. In this study, we mainly focus on precipitation processes typically occurring in stratiform precipitation, where negative  $K_{dp}$  is not important. The Maesaka et al. (2012) algorithm should be avoided when studying precipitation events with lightning activity, where negative  $K_{dp}$  may occur due to electrification. The total fraction of profiles analyzed in this study that represent strong convective cells with a possibility for lightning activity, is expected to be marginal, as discussed further in Sect. 4.

## 2.2 Radar data preprocessing

Prior to training or using the polarimetric radar vertical profile data for the classification, noise and clutter filtering is applied, which is followed by normalization and smoothing. Additionally, there are different preprocessing procedures for rain and snow events that allow taking ambient temperature into account in the classification. This section describes the mentioned preprocessing steps in more detail.

### 2.2.1 Profile truncation

This paper focuses on identifying, characterizing and investigating the frequencies of different types of vertical structures of dual polarization radar variables specifically from the perspective of detecting, documenting and studying ice processes. Therefore, before the classification, vertical profiles of radar variables are truncated at the top of melting layer (ML), if one is present. Cases where melting layer signatures were not identified and surface air temperature was 1 °C or lower, are placed in the snowfall category and investigated separately.

Following Wolfensberger et al. (2015), who have used gradient detection on a combination of normalized  $Z_H$  and  $\rho_{hv}$  for ML detection, we combine  $\rho_{hv}$  and standardized  $Z_e$  and  $Z_{DR}$  into a melting layer indicator:

$$I_{ML} = \hat{Z}_e \hat{Z}_{DR} (1 - \rho_{hv}) \quad (1)$$

The same standardization of  $Z_e$  and  $Z_{DR}$  is used here as in classification, as described in Sect. 3.1. In this study, instead of gradient detection, we use peak detection on smoothed  $I_{ML}$  to find the ML. Peaks are defined as any sample whose direct neighbors have a smaller amplitude, and are found in three steps:

1. Peak detection is performed with thresholds for absolute peak amplitude and prominence ( $H_{I_{ML}}$ ; as described below), with chosen values of 2 and 0.3, respectively. [The SciPy \(Version 1.3; Jones et al., 2019\) implementation of the peak detection algorithm is used here.](#)
2. Median ML height,  $\tilde{h}_{ML}$ , is computed as the weighted median of the peak altitudes,  $h_i$ , using the product of peak absolute amplitude and ~~prominence~~  $H_{I_{ML}}$  as weights. Peaks above a chosen height threshold of ~~4200 m~~  $h_{thresh} = 4200 \text{ m}$  are ignored in this step, ~~as we do not expect melting above this altitude.~~
3. Step 1 is run again, this time only considering data within  $\tilde{h}_{ML} \pm \Delta h_{ML}$  with a chosen  $\Delta h_{ML}$  value of 1500 m. If multiple peaks exceed the threshold values within a profile, the one with the highest amplitude is used.

The ML top height  $h_{ML,top}$  is estimated as the altitude corresponding to ~~30-% peakprominence level above the peak the~~ [0.3  \$H\_{I\_{ML}}\$  upper contour of the peak. Peak prominence,  \$H\$ , is a measure of how much a peak stands out from the surrounding baseline value and is defined as the difference between the peak value and its baseline. The baseline is the lowest contour line of the peak encircling it but containing no higher peak \(Jones et al., 2019\).](#)

[It should be noted that in steps 2. and 3., the analysis height is limited to reflect the climatology of temperature profiles on the measurement site. In step 2., we assume ML to be always below  \$h\_{thresh}\$ , and in step 3., we expect melting layer height not to](#)

change more than  $\Delta h_{\text{ML}}$  during an event. Such use of domain knowledge allows more robust ML detection in situations where  $I_{\text{ML}}$  has high values elsewhere. This may occur e.g. in dendritic growth layer (DGL), where the crystals can be pristine enough to cause a significant increase in  $Z_{\text{DR}}$  and a decrease in  $\rho$ .

Sensitivity of the ~~estimate-retrieved~~  $h_{\text{ML,top}}$  is tested for small changes in peak detection parameters discarding inconsistent values. A moving window median threshold filter is applied on time series of  $h_{\text{ML,top}}$  in order to discard rapid high amplitude fluctuations caused by e.g. noise in  $Z_{\text{DR}}$ . A rolling triangle mean is used for smoothing. Finally, linear interpolation and constant extrapolation is applied on  $h_{\text{ML,top}}$  on per precipitation event basis to make the estimate continuous. This robust, albeit fairly complex procedure produces a smooth estimate for melting layer top height.

The analysis of rain profiles is limited to a layer from  $\Delta h_{\text{margin}} = 300$  m to 10 km above  $h_{\text{ML,top}}$ . The purpose of the margin  $\Delta h_{\text{margin}}$  is to prevent properties of the melting layer from leaking to the clustering features. The truncation described in this section has no effect on the height bin size.

### 2.2.2 Absence of melting layer

Cutting the rain profiles at the top of melting layer effectively provides information about the ambient temperature at the profile base. As temperature is a key factor driving the ice processes, such information should be included in the classification process also when there is no ML present. In this study order to introduce corresponding information on ambient temperature at the profile base, we use surface temperature as an extra classification parameter for events with snowfall on the surface. While it would be possible to use whole temperature profiles from soundings or numerical models as classification parameters, we feel that this may not be feasible for many potential key use cases of the classification method. ~~Furthermore, such approach would make the classification approaches for rainfall and snowfall cases very different.~~ With the wide availability of surface temperature observations in high temporal resolution and in real time, presumably this choice makes the classification method more accessible especially for operational applications.

The analysis of snow profiles is limited to a 10 km layer from the surface lowest elevation of 200 m.

## 3 Classification method

The unsupervised classification method used in this study is based on clustering of dual-polarization radar observations, namely vertical profiles of  $K_{\text{dp}}$ ,  $Z_{\text{DR}}$  and  $Z_e$ . Feature extraction is performed by applying principal component analysis (PCA) on standardized profiles. Clustering is applied on the principal components of the profiles using the  $k$ -means method (Lloyd, 1982). A flowchart of the whole process is shown in Fig. 1.

While the core method is identical for processing of all radar profiles, information on temperature is included in slightly different way based on if it is raining or snowing on the surface. These differences are explained in sections 2.2.1 and 2.2.2 and highlighted in Fig. 1: For rain events, the profiles are cut at top of melting layer, and for events without a ML, surface temperature is included as an extra classification variable. Using this approach, information on profile base ambient temperature is included in the classification process, and the analysis is limited to ice processes.

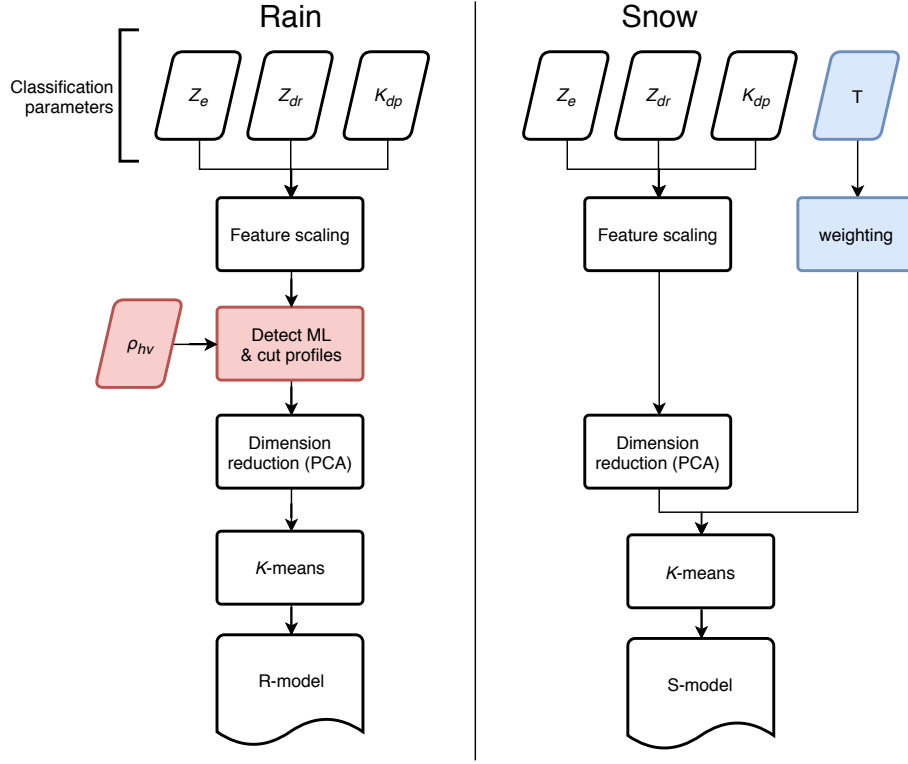

**Figure 1.** Vertical profile clustering method for creating classification models for rain and snow events.

**Table 1.** Standardization of radar variables,  $[a, b] \rightarrow [0, 1]$ .

|                                     | Rainfall |      | Snowfall |      |
|-------------------------------------|----------|------|----------|------|
|                                     | $a$      | $b$  | $a$      | $b$  |
| $Z_e$ , dBZ                         | -10      | 38   | -10      | 34   |
| $Z_{DR}$ , dB                       | 0        | 3.1  | 0        | 3.3  |
| $K_{dp}$ , $^{\circ}\text{km}^{-1}$ | 0        | 0.25 | 0        | 0.11 |

### 150 3.1 Feature extraction

The vertical resolution of the ~~data is 50 m~~ interpolated data is 50 m with bins from ~~200 m to 10 km altitude~~ With 200 m to 10 km altitude for snow events and from 300 m to 10 km above melting layer top for rain events. Thus, with the three radar variables, each profile is described by a vector of 588 ~~dimensions in total~~ and 582 dimensions for snow and rain events, respectively. In this study, we apply PCA on standardized profiles of the polarimetric radar variables to extract features for the

155 clustering phase.

A standardization of the preprocessed polarimetric radar data is performed to allow adequate weights for each variable in clustering. This was done separately for the snow and rain data sets in order to account for seasonal differences in the average values. We used similar standardization as Wolfensberger et al. (2015), normalizing typical ranges of values  $[a, b] \rightarrow [0, 1]$ , with the additional condition that the standardized variables should have approximately equal variances. The values  $a, b$  used in this study are listed in Table 1. ~~Without this step~~The values of the standardized variables are not capped, but values greater than 1 are allowed when the unscaled values exceed  $b$ . Without the standardization, the dominance of each variable in classification would be determined by their variance.

The number of components explaining a significant portion of the total variance for the two training data sets was determined considering the Scree test (Cattell, 1966), the Kaiser method and the component and cumulative explained variance criteria. However, these criteria alone would allow such a low number of components, that the inverse transformation from principal component space to the original would result in unrealistic profiles. Thus, the number of components was increased such that, visually, the inverse transformed profiles presented the significant features in the original profiles, up until to the point where adding more components seemed start explaining trivial features such as noise.

For both rain and snow profile classification, the first 30 components are used as features. The high number of significant components suggests that reducing the dimensionality of radar observations is not trivial. An advantage of using PCA over simply sampling the profiles is that the former interconnects data from different heights and radar variables such that the components effectively represent features in the profile shapes, while sampling would rather be driven by absolute values at the individual sampling heights.

With snow profile classification, a proxy of the surface temperature,  $P(T_s) = aT_s$ , where  $a$  is a scaling parameter, is used as an additional feature. Thus, essentially,  $\sigma_{T_s}$  within a cluster is decreased with increasing  $a$ . In this study, value of  $a$  was determined in an iterative process during the clustering phase, described in Sect. 3.2, such that, over the clusters,  $\text{median}(2\sigma_{T_s}) \approx 3^\circ\text{C}$ . Thus, assuming  $T_s$  is normally distributed within a given cluster, approximately 95 % of the values of  $T_s$  would be typically within a range of  $3^\circ\text{C}$  from the cluster mean. A value of  $a = 0.75$  was used in this study.

### 3.2 Clustering

In the present study, the widely used  $k$ -means method was chosen for clustering. The algorithm is known for its speed and easy implementation and interpretation. Limitations of the method include the assumption of isotropic data space, sensitivity to outliers (Raykov et al., 2016), and the possibility to converge into a local minimum which may result in counterintuitive results. In our analysis, the anisotropy of the data space is partly mitigated by the PCA transformation. After the transformation, there is still anisotropy, but the transitions in density of the data points in PCA space are smooth (not shown), such that  $k$ -means seems to produce clusters of meaningful sizes and shapes. The problem of local minima is addressed using the  $k$ -means++ method (Arthur and Vassilvitskii, 2007) to distribute the initial cluster seeds in a way that optimizes their spread. The  $k$ -means++ is repeated 40 times and the best result in terms of sum of squared distances of samples to their closest cluster center is used for seeding.

### 3.3 Selecting the number of classes

190 An important but non-trivial consideration in using  $k$ -means clustering is the choice of number of clusters,  $k$ . A good model should explain the data well while being simple. Several methods exist for estimating the optimal number of classes. Nevertheless, often domain and problem specific criteria have to be applied for the best results.

The optimal number of clusters depends on variability in the data and correlations between different variables. The more variability and degrees of freedom, the more clusters are generally needed to describe different features in a dataset. Since one  
195 important use case for the method is ice process detection, particular attention is paid in separation of fingerprints of different processes between classes. An optimal set of classes would maximize this separation without introducing too many classes to make their interpretation complicated.

As the problem of the number of classes is complex, it is difficult to find an unambiguous quantitative measure for evaluating the correct number of classes. Attempts to create a scoring function for optimizing the separation of ice processes alone did  
200 not yield satisfactory results, but were rather used to support the manual selection process.

Silhouette analysis (Rousseeuw, 1987), which is a method for measuring how far each sample is from other clusters (separation) compared to its own cluster (cohesion), was also considered for selecting  $k$ . The metric, silhouette coefficient  $s$ , takes values between -1 and 1. The higher the value, the better the profile represents the cluster it is assigned to. A profile with  $s = 0$  would be a borderline case between clusters, and negative values indicate that the profiles might have been assigned to wrong  
205 clusters. Silhouette score  $\bar{s} = \frac{1}{k} \sum_{i=1}^k s_i$  can generally be used for choosing  $k$ . Unfortunately, when applied to the radar profile clustering results,  $\bar{s}$  decreases almost monotonically with increasing  $k$  in the ranges of  $k$  analysed, and thus did not prove very useful for this purpose. Rather, in this study, we calculate  $s$  for each profile classification result individually as a measure of how well the profile represents the class it is assigned to.

The process of selecting the number of rain and snow profile clusters,  $k_R$  and  $k_S$ , respectively, was as follows: First, the  
210  $k$ -means clustering was repeated 12 times for each  $k$  in  $[5, 21]$  with 40  $k$ -means++ initializations. This is where the above-described silhouette analysis was performed for each set of clusters and the stability of the initialization process was analyzed for each  $k$ . Between the 12 repetitions, the clustering converges to identical results for each  $k_R < 12$  and  $k_S < 10$  ~~after which~~  
. With higher values of  $k$ , there are multiple solutions to the clustering problem with only minor differences between them. Likewise, the cluster centroid profiles even with different  $k$  were highly consistent, such that clustering results with  $k$  and  $k + 1$   
215 clusters would typically share  $k - 1$  to  $k$  very similar cluster centroids.

This stability of the clustering results makes it convenient to select  $k$  manually. In the second stage, we analysed each separate clustering solution for differences between the clusters from the point of view of snow processes and surface precipitation. Specifically, an important criterion was to separate the typical  $K_{dp}$  signatures of dendritic growth (e.g. Kennedy and Rutledge, 2011) and the H-M process (Field et al., 2016) into different classes. On the other hand, the use of an unsupervised classification  
220 method should also allow us to discover previously undocumented features in the radar profiles if they are present in the data in significant numbers.



The goal in this step is to find as many significant unique fingerprints with as low  $k$  as possible by manual evaluation. Significant differences between clusters in this context include variations in profile shapes and altitudes of characteristics such as bands, clear differences in echo top heights, or differences of cluster centroid  $T_s$  of more than  $3^\circ\text{C}$ . The most common  
225 trivial difference between a pair of clusters was a difference in the intensity of polarimetric radar variables while the shapes of the cluster centroid profiles were almost identical. Altitude differences between fingerprints of overhanging precipitation were also considered trivial.

During this process, allowing some profile classes with only trivial characteristics was inevitable in order to include others with significant unique fingerprints. For this reason, some classes likely reflect natural variability of the same microphysical  
230 process rather than unique processes, and need to be combined. However, the optimal way of combining the classes may depend on the application. Thus, we present the classes uncombined in this paper.

In snow profile clustering,  $T_s$  as an extra classification parameter adds a significant additional degree of freedom. Thus, a larger number of snow profile classes are needed to meet the criteria described above. In clustering, there is a distinguishable separation between clusters representing  $T_s$  close to  $0^\circ\text{C}$  and around  $-10^\circ\text{C}$ . The vast majority of profiles belong to the  
235 warmer group.

Taking all the mentioned considerations into account, we chose to use 10 and 16 classes for rain and snow profiles, respectively. In 12 of the snow profile class centroids,  $T_s > -5^\circ\text{C}$ . In this paper, the rain and snow profile classification models are termed R-model and S-model, respectively.

In this section we have described our approach for optimizing the number of classes with the main criteria of separating the  
240 main profile characteristics and the fingerprints of ice processes into individual classes. It should be ~~also noted~~noted, however, that there is a large spectrum of research problems and operational applications where an unsupervised profile classification method such as the one described in this paper could be potentially useful. The optimal number of classes ~~, however,~~may depend on the application.

## 4 Results

245 Class centroids of rain and snow profile classes are shown in Figs. 2 and 3, respectively. The centroid profiles of dual polarization radar variables are inverse transformed from corresponding centroids in PCA space. Classes are numbered in the ascending order by the value of the first principal component in the class centroids. ~~The~~By definition, the first component has the largest variance and has therefore the biggest influence on the clustering and classification results. The value of this component is strongly correlated with intensities of  $K_{dp}$  and  $Z_e$ .

250 A number of class centroids in both classification models display distinct features in dual polarization radar variables often linked to snow processes, such as bands and gradients in  $K_{dp}$  and  $Z_{DR}$ . Such features and their connection to other characteristics in the vertical structure of the profiles, and finally to the precipitation processes are discussed in this section.

As a general pattern in Figs. 2 and 3 we see ~~the anticorrelation of peak that the highest values of  $Z_{DR}$  and are associated with low echo tops while the highest~~  $K_{dp}$  values ~~in the class centroids~~occur in deeper clouds. This is in line with the previously

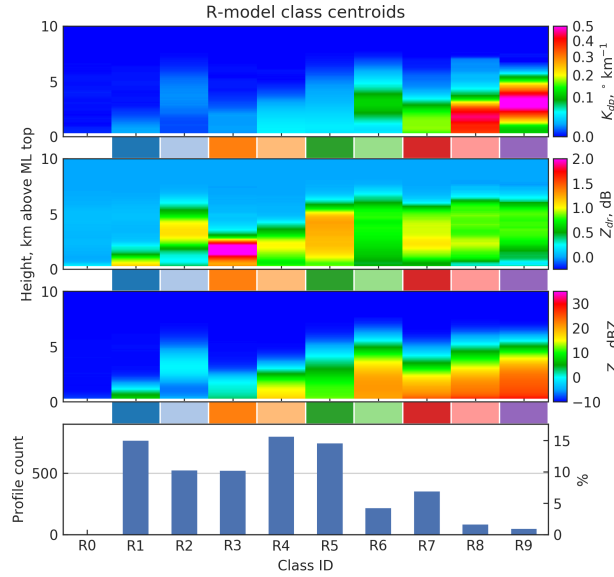

**Figure 2.** Class centroid profiles of the R-model. Profile counts per class are shown at the bottom omitting the count for low-reflectivity class R0. Between the panes, each class has been assigned a color code.

reported findings (Kennedy and Rutledge, 2011; Bechini et al., 2013; Moisseev et al., 2015; Schrom et al., 2015; Griffin et al., 2018) that echo tops in ~~dendritic-growth-layer (DGL)~~ DGL are associated with high  $Z_{DR}$  and low  $K_{dp}$  in the layer, whereas high  $K_{dp}$  in the DGL with low  $Z_{DR}$  is associated with echo tops in  $T < -37^{\circ}\text{C}$  where homogeneous freezing occurs. Using the NCEP GDAS model output, we analyzed the echo top temperatures,  $T_{top}$ , of each vertical profile radar observation. The results, grouped by profile class, are visualized in Fig. 4. It should be noted, that in the summer, cold echo tops may be caused by strong updrafts in convection, whereas during the winter, echo tops colder than approximately  $-37^{\circ}\text{C}$  are a more unambiguous indication of homogenous freezing. Inspecting the class centroids in Figs. 2 and 3, and comparing them to echo top heights in Fig. 4, it is evident that  $K_{dp}$  bands, especially elevated ones, are strongly associated with high echo tops.

The clustering results expose a prominent seasonal difference in  $K_{dp}$  intensity: consistently lower values are present in snow events. There are 4 rain profile classes in contrast to only 2 snow profile classes with peak cluster centroid  $K_{dp}$  exceeding  $0.1^{\circ}\text{km}^{-1}$ . They represent total fractions of 13 % and 4 % of rain and snow profiles, respectively. Corresponding to this difference, in Figs. 2, ~~3~~, and 3, as well as in Figs. 7 and 8 introduced later,  $K_{dp}$  is visualized in different ranges in relation to rain and snow profiles. The seasonal differences in  $Z_{DR}$  and  $Z_e$  intensities are less prominent. High  $K_{dp}$  in the summer may be linked to higher water content during the season.

Convection in the summer, especially in the presence of hail, is linked to extreme values of radar variables and high echo tops, which may also have a small contribution to the seasonal differences. However, convective rain storms are of short duration, and thus typically present in just a couple of profiles per a convective cell. Therefore, their impact on the class properties are

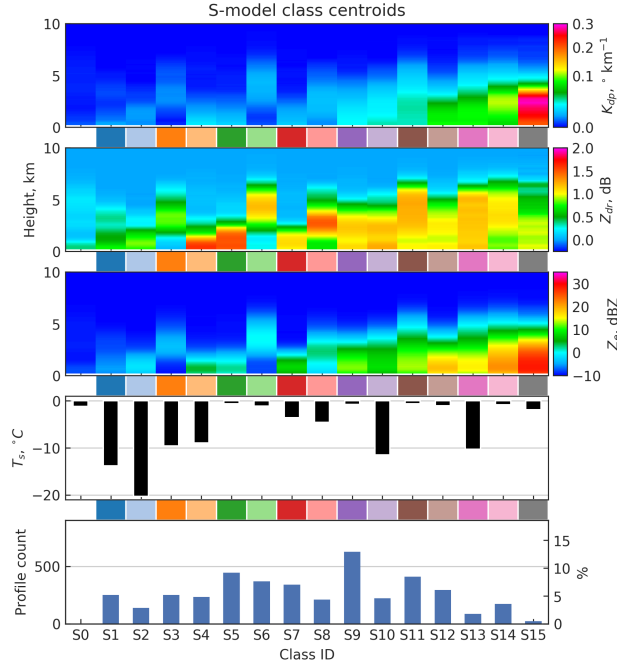

**Figure 3.** Class centroid profiles of the S-model. Top panel shows class centroid surface temperatures. Profile counts per class are shown at the bottom omitting the count for low-reflectivity class S0. Between the panes, each class has been assigned a color code.

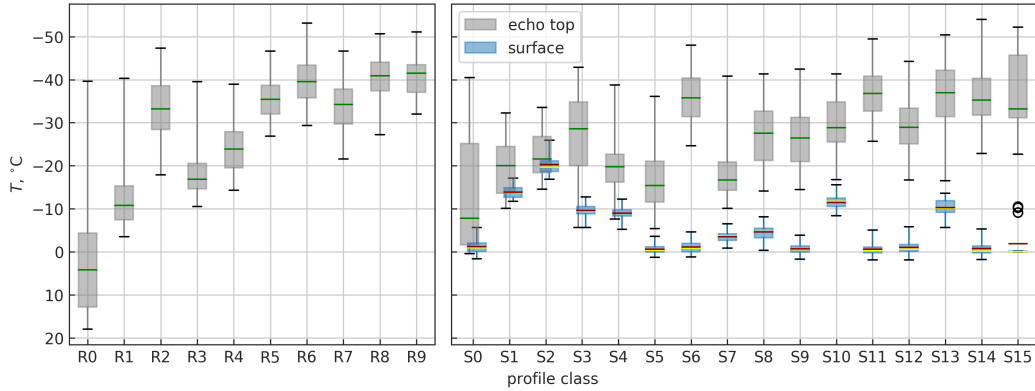

**Figure 4.** Cloud top temperature distributions by class (gray) with green line marking the medians. For S-classes, also surface temperature distribution is shown (blue) with red lines marking the class centroid and yellow lines marking the median. Boxes extend between the 1st and the 3rd quantiles, and whiskers cover 95 % of the data.

expected to be limited. Manual analysis revealed that classes R6 and R9 have the highest, and R5 the lowest fractions of profiles measured in convective cells. Further details of this analysis are presented in Sect. 4.2.

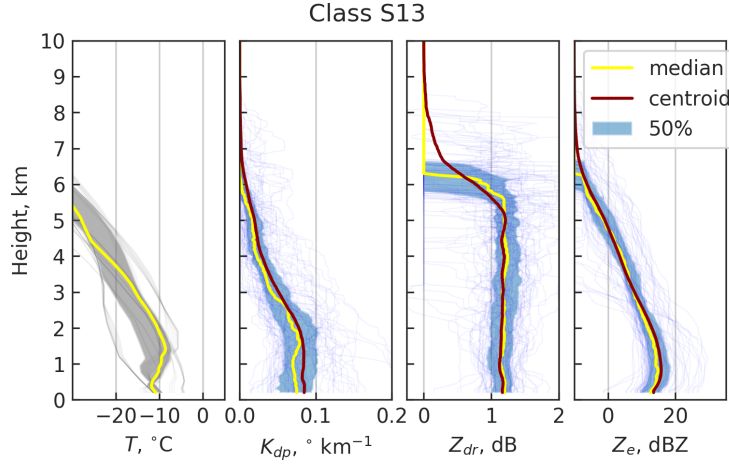

**Figure 5.** Class S13 centroid is visualized on the three rightmost panes. Individual class member profiles are marked with thin lines. The pane on the left shows corresponding NCEP GDAS temperature profiles. The areas between the first and the third quantiles are shaded, radar data in blue and GDAS in gray.

Class frequencies are presented in the bottom panels of the Figures 2 and 3. Classes S0 and R0 represent very low values of  $Z_e$  throughout the column, i.e. profiles with very weak or no echoes. Therefore their frequencies depend merely on the subjective selection of observation period boundaries, and are thus omitted in the figures. Boundaries of the precipitation events are partly based on these two 0-classes. Events are considered independent and separate if between them there are profiles classified as S0 or R0 continuously for at least 12 hours.

In respect of  $K_{dp}$  intensity, classes in the R-model, there are four low- $K_{dp}$  classes, can be divided into four categories: R0 through R3, with maximum centroid specific differential phase,  $\max(K_{dp,c}) < 0.02^\circ \text{ km}^{-1}$ . For with negligible  $K_{dp}$ , low- $K_{dp}$  classes R4 and R5 the centroid maximum value is roughly  $0.04^\circ \text{ km}^{-1}$  and for with  $\max(K_{dp,c}) \approx 0.04^\circ \text{ km}^{-1}$  high- $K_{dp}$  classes R6 through R9, and R7 with  $\max(K_{dp,c}) > 0.11^\circ \text{ km}^{-1}$ . Centroid  $K_{dp}$  of, and classes R6 and R8 and R9 peaks roughly at 3 km, with 1st and 3rd quantiles at 2.1 km and 4.0 km for representing extreme values ( $\max(K_{dp,c}) \approx 0.5^\circ \text{ km}^{-1}$ ). The subscript "c" denotes a class centroid value as opposed to values in individual profiles. The peak  $K_{dp,c}$  of both R6 and at 2.1 km and 3.8 km for R9, respectively. Assuming  $T = 0^\circ \text{C}$  at ML top, and moist adiabatic lapse rate, 2.1 km and 4.0 km correspond to roughly  $-15^\circ \text{C}$  and  $-32^\circ \text{C}$ . R9 is at 3 km, corresponding to class mean GDAS temperatures of  $-16^\circ \text{C}$  and  $-18^\circ \text{C}$ , respectively. Essentially, R6 and R9 represent profiles with these two classes represent clear  $K_{dp}$  in DGL or colder temperatures bands in the DGL.

Classes R7 and R8 feature considerable  $K_{dp}$  in 2–3 km thick layers right above ML, with centroid values slightly below  $0.2^\circ \text{ km}^{-1}$  and around  $0.4^\circ \text{ km}^{-1}$ , respectively. Essentially, both classes represent  $K_{dp}$  signatures in both DGL and temperatures favored by the H-M process. Sinclair et al. (2016) found that the typical  $K_{dp}$  values for the H-M process are capped at

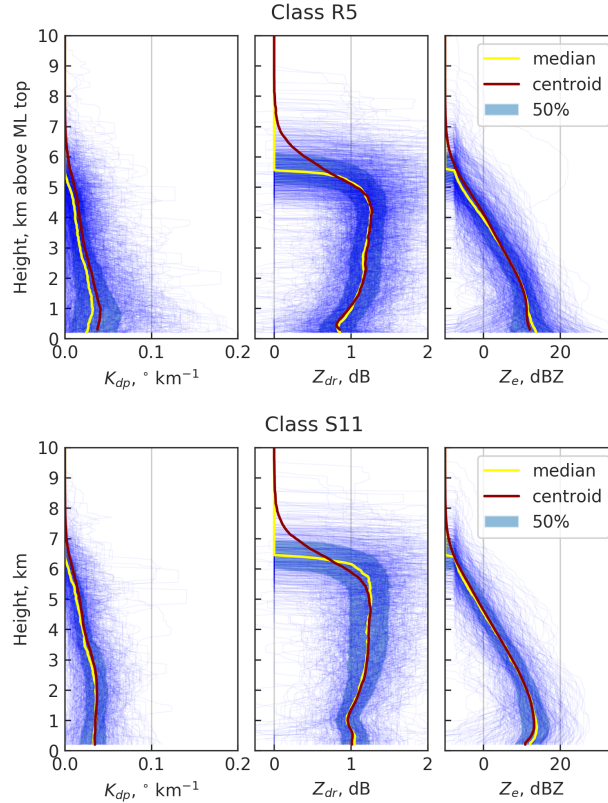

**Figure 6.** Comparing classes R5 (top panels) and S11 (bottom panels) shows evident similarities. Individual class member profiles are marked with thin blue lines and the areas between the first and the third quantiles are shaded with blue.

0.2–0.3 °km<sup>−1</sup> for C-band due to onset of aggregation. Based on this, it can be argued that R7 is a more likely indicator of H-M than R8.

Classes R3 and R4 were found to often coexist in precipitation events. Both are characterized low  $K_{dp}$  and a band of  $Z_{DR}$  in  
 295 DGL. In [R3 profiles, Fig. 4, we see that](#) the echo tops are lower [for the R3 profiles](#), typically in the DGL. Therefore, we would expect growth of pristine crystals in low number concentrations, and consequently with no significant aggregation. This would explain why peak  $Z_{DR}$  values from 3 to 5 dB are common in relation with R3. Profiles classified as R4, on the other hand, have slightly higher echo tops ([T < −20°C](#)), which are expected to result in higher number concentrations, leading to aggregation. The R4 profiles are characterized by much lower  $Z_{DR}$  values.

300 In the S-model (Fig. 3), classes S0 through S3 represent profiles with low values of all three radar variables, each with  $\max(Z_{e,c}) < 0$  dBZ,  $\max(Z_{DR,c}) < 1$  dB and  $\max(K_{dp,c}) < 0.01$  °km<sup>−1</sup>. These four low reflectivity classes represent different surface temperatures, which is likely a major driver for the separation of these classes in the clustering process. Classes S4 and S5 represent low echo top profiles with high  $Z_{DR}$ , with class centroid surface temperatures of −9.0 °C and −0.6 °C, respectively. Further analysis of NCEP GDAS temperature profiles reveals that, across the board, there is an inversion layer

305 present where radar profiles are classified as S4, typically with temperatures below  $-10^{\circ}\text{C}$  within the lowest kilometer. This corresponds well with the bump in  $Z_{\text{DR},c}$  close to the surface, suggesting possible growth of pristine dendrites within a strong inversion layer. In contrast, there is no inversion in connection with profiles belonging to S5, and the enhancement in  $Z_{\text{DR}}$  occurs already at 2 to 3 km above the surface, where the median NCEP GDAS temperature for S5 profiles is roughly between  $-18$  and  $-10^{\circ}\text{C}$ . S5 is the second most common class in S-model classification results.

310 Classes S6 and S8 represent situations where precipitation is detached from the surface. These types of profiles are typically present in association with approaching frontal systems before the onset of surface precipitation. The most frequent class of the S-model is S9 covering 13 % of the profiles. It represents moderate values of polarimetric radar variables and cloud top height. The most extreme values of reflectivity and  $K_{\text{dp}}$  values in the S-model are represented by classes S14 and S15. For both classes,  $K_{\text{dp},c}$  peaks above 3 km suggesting dendritic growth in the member profiles. Values of  $Z_{\text{DR},c}$  are significantly lower  
315 compared to other high echo top classes with weaker  $K_{\text{dp},c}$ . Class S15 can be seen as a more extreme variant of S14 with much stronger  $K_{\text{dp},c}$  and  $Z_{e,c}$ . In addition, S15 represents lower values of  $Z_{\text{DR}}$  near the DGL. These differences are likely due to even higher ice number concentrations in S15 profiles, which lead to more intense aggregation.

Comparing class centroid  $T_s$  and class frequencies in Fig. 3 it can be seen that most snowfall occurs at  $T_s \approx 0^{\circ}\text{C}$ . Further analysis of GDAS temperature profiles for the snow events revealed that typically cold surface temperatures ( $T_s < -6^{\circ}\text{C}$ )  
320 are heavily contributed by strong inversion layers. The centroid and members of S13 are visualized in Fig. 5, along with the member GDAS temperature profiles. The profile class is characterized by a thick layer of considerable  $K_{\text{dp}}$  from 2 to 3 km to the surface, and  $T_s \approx -10^{\circ}\text{C}$ . As seen in the left panel of Fig. 5, S13 represents conditions where  $T$  typically falls below  $-10^{\circ}\text{C}$  close to the surface. This finding suggests that a second DGL may occur in a strong inversion layer.

Sinclair et al. (2016) showed that  $K_{\text{dp}}$  at the  $-8$  to  $-3^{\circ}\text{C}$  temperature range can be used for identifying the H-M process. Such  
325 fingerprints are present especially in profiles classified as R7 or S12. However, manual analysis of the profile data revealed that both of these classes represent a mixture of fingerprints indicating H-M, dendritic growth or the co-presence of both processes. In several events, there were continuous time frames of profiles classified as either R7 or S12 during which the altitude of the  $K_{\text{dp}}$  signal was changing from profile to profile between DGL and  $0^{\circ}\text{C}$  level, and was occasionally bimodal. One example of such time frame is shown in Fig. 7 and discussed further in SeeSect. 4.1.1. Some bimodality is present also in the centroid  $K_{\text{dp},c}$  of both classes, suggesting that the elevated  $K_{\text{dp},c}$  values in the H-M region cannot be explained solely by sedimenting planar crystals generated aloft, but are contributed by the H-M process.

While neither in rain nor snow profile classification, there are classes with clear-cut  $K_{\text{dp},c}$  bands at altitudes corresponding to temperatures preferred by the H-M process, there are, in contrast, several classes with strong elevated  $K_{\text{dp},c}$  bands. The proposal of Sinclair et al. (2016) that  $K_{\text{dp}}$  fingerprints of the H-M process are not very pronounced may explain the tendency  
335 of the classification method not to produce more pure H-M classes. Nevertheless, R7 and S12 can be used as indicators for conditions where H-M may occur.

Despite the differences in the classification methods for rain and snow profiles, there are prominent similarities between the two models and profile classes therein. Archetypal classes such as high echotops in the presence of elevated  $K_{\text{dp}}$  bands (R6, R9, S14, S15) or high  $Z_{\text{DR}}$  in shallow precipitation (R3, S4, S5) exist in both classification models. Frequent classes R5 and

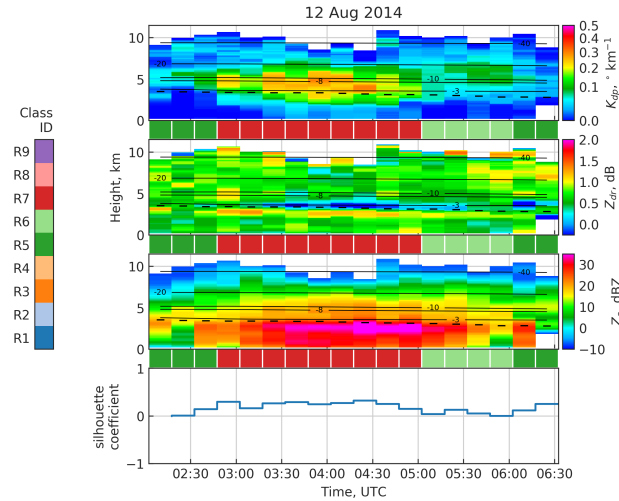

**Figure 7.** Classification analysis of a rain case with silhouette scores. The automatically detected melting layer is marked with a dashed line, solid lines show NCEP GDAS temperature contours, colors between the panes denote classification results.

340 S11, visualized side by side in Fig. 6 can be considered direct counterparts of each other; The vertical structure of polarimetric radar variables above ML in R5 match strikingly well with S11. The two classes are characterized by weak  $K_{dp}$  and typical values of  $Z_{DR}$  slightly above 1 dB aloft, decreasing towards the altitude corresponding to  $0^{\circ}\text{C}$ . Presumably, this indicates the presence of aggregation.

#### 4.1 Case studies

345 In Figures 2 and 3, each class is assigned a color code (between the panels). ~~The same~~ This color coding is used in Figures 7 and 8 to mark classification results in a rain and a snow case, respectively. Note, that the same set of colors are used for denoting rain and snow profile classification, but they should not be confused with each other.

##### 4.1.1 August 12, 2014

In Fig. 7, rain profile classification has been applied on a precipitation event from August 12, 2014. During this event, echo  
 350 tops repeatedly exceed 10 km. Only the parts of the profiles above melting layer top are analyzed here, since everything below that level is invisible to the classifier. The first two and the last two profiles shown in the figure are characterized by low  $Z_e$  and low  $K_{dp}$ , while  $Z_{DR}$  has values around 1 dB. These profiles are classified as R5 (dark green). Between 2:30 and 3:00 UTC, a significant increase in  $K_{dp}$  occurs followed with an increase in reflectivity and decrease in  $Z_{DR}$ . The temperature (altitude) of the downward increase in  $K_{dp}$  varies from  $-20^{\circ}\text{C}$  level to closer to ML. In this phase, there is also a small increase in  $Z_{DR}$   
 355 in the DGL whenever the increase of  $K_{dp}$  also occurs in the DGL. This phase in the event is sustained until around 5:00 UTC and is classified as R7 (dark red). It is followed by approximately an hour of a weaker elevated  $K_{dp}$  band at around 4 to 6 km

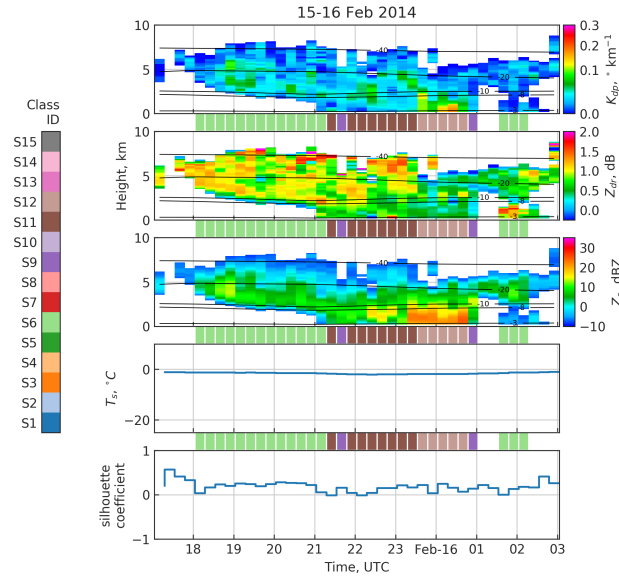

**Figure 8.** Classification analysis of a snow case with silhouette scores. The automatically detected melting layer is marked with a dashed line, solid lines show NCEP GDAS temperature contours, colors between the panes denote classification results.

altitude with profiles classified as class R6 (light green). The silhouette coefficient is positive throughout the event indicating good confidence of the classification results. The silhouette of the profiles classified as R6 is not very high, though, which is likely due to lower values of  $Z_e$  compared to the class centroid.

Similar analysis of more rain events in the data set reveals that, similarly to the August 12 event, R7 typically coincides with an increase of  $K_{dp}$  in the DGL, H-M layer or both, often with varying altitude. Without in situ observations or analysis of Doppler spectra, it is not trivial to tell whether this variability is due to co-presence of dendritic growth and H-M, or simply fall streaks. Class R6, on the other hand, is more specific to a  $K_{dp}$  fingerprint in the DGL. The more infrequent profiles with clear  $K_{dp}$  bands above the DGL are typically also classified as R6 or R9.

#### 4.1.2 February 15–16, 2014

Classification results for February 15–16, 2014 are shown in Fig. 8. The event has a clear structure of an approaching frontal system. Between 17 and 18 UTC  $Z_e$  is very low, corresponding to class S0, which is marked with white color between the panels. Between 18 and 21 UTC, the event starts with overhanging precipitation, classified as S6 (light green). This is followed by light precipitation with echo tops roughly 7 to 8 km, and relatively high  $Z_{DR}$  near the echo top, decreasing downwards. This corresponds well with class S11 (dark brown). After 23:30 UTC, The echo top height is decreased to roughly 6 km,  $Z_{DR}$  is decreased and  $K_{dp}$  signals appear close to ground level. The increase in  $K_{dp}$  occurs within the  $-8$  to  $-3$  °C temperature range suggesting the presence of the H-M process. Indeed, Kneifel et al. (2015) report needles, needles aggregates and rimed particles on the surface at the measurement site during this period, and favorable conditions for rime splintering. Further, using



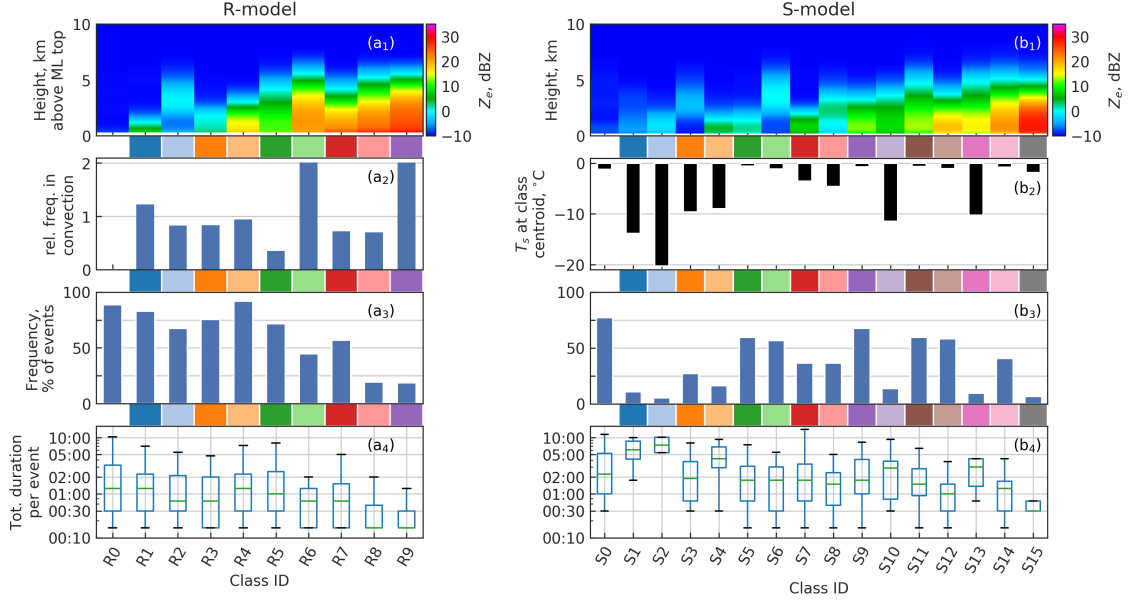

**Figure 9.** Statistics on frequency of each profile class. Classes are identified by class centroid  $Z_e$  at the top panels, class centroid  $T_s$  for snow profile classes (b<sub>2</sub>), color codes between the panels and class IDs at the bottom. Class frequencies are given as relative class frequencies in convective events compared to average (a<sub>2</sub>), percentage of events (a<sub>3</sub>, b<sub>3</sub>) and total durations (a<sub>4</sub>, b<sub>4</sub>) within events.

Weather Research and Forecast (WRF) model, Sinclair et al. (2016) showed that secondary ice processes are needed to explain the observed number concentrations during this time period. The corresponding profiles are classified as S12 (light brown). Within this case study, two profiles, marked with dark purple color, are classified as S9, likely due to the momentary absence of any strong  $K_{dp}$  or  $Z_{DR}$  signals.

## 4.2 Statistics

Frequency statistics of the profile classes are presented in Fig. 9. We analyzed a subset of rain events as either convective or stratiform using a number of sources of publicly available satellite and numerical model data. Out of 86–70 events analyzed, 17–15 were convective and 69–55 stratiform. Panel (a<sub>2</sub>) in Fig. 9 shows the normalized frequency of the classes in convective events. On average, twice as many profiles are classified as R6 and R9 in convective situations compared to their average frequencies. Both classes are characterized by high echo tops and elevated  $K_{dp}$  bands. On the other hand, classes R7 and R8, also representing high  $K_{dp}$  values, but closer to the melting layer than R6 and R9, appear in lower than average frequency in convective situations. Class R5 is most pronouncedly characteristic for stratiform events, with frequency in convective events roughly one third of the average value.

Panels (a<sub>3</sub>) and (b<sub>3</sub>) of Fig. 9 show the fractions of independent precipitation events in which each class occurs. With rain events, this frequency correlates inversely with  $K_{dp,c}$ . Rain profiles classified as R8 and R9, which represent the strongest  $K_{dp}$

signatures, occur in 20 % and 19 % of the events, respectively, with at least one of the two occurring in 25 % of the events.  
390 Classes R6 and R7, which also represent considerable  $K_{dp}$  features, occur in 45 % and 57 % of cases, respectively, and the rest of the classes between 67 % and 92 % of the cases.

With snow events, the likelihood of a given class occurring within an event correlates not only with peak  $K_{dp,c}$  but also with surface temperature. Any class representing low  $K_{dp}$  values and surface temperature close to 0 °C occurs in more than half of the snow events.

395 The per precipitation event class persistence is visualized in the bottom panels of Fig. 9. Profile classes representing the highest values of  $Z_e$  at the surface, namely R6–R9, S12, S14 and S15, are short-lived, whereas snow profile classes characterized by cold surface temperatures are the most persistent. Profiles classified as R0 or S0 omitted, the median durations of rain and snow events in the data set are 5.5 h and 11.5 h, respectively. This difference explains why S-classes are on average more persistent than R-classes.

## 400 5 Conclusions

A novel method of dual polarization radar profile classification for investigating vertical structure of snow processes in the profiles was presented in this paper. The method is based on clustering of data-driven features of vertical profiles of  $K_{dp}$ ,  $Z_{DR}$  and  $Z_e$ . It was applied on vertical profile data extracted from C-band RHI scans over Hyttiälä measurement station in Southern Finland. We applied separate versions of the method based on if surface precipitation type was rain (R-model) or snow (S-  
405 model). In the R-model, profiles are truncated at the melting layer top, and in the S-model, surface temperature is used as an additional classification feature. The content of the vertical profile classes was manually interpreted.

In the present investigation, some class centroids resembled textbook examples of previously documented snow process fingerprints, while others may represent a mixture of different conditions. If temperature profiles from either soundings or numerical models are available, the interpretation can be done in the absence of surface crystal type reports. Notably, this is  
410 prerequisite in cases of rainfall when direct observations of crystal types cannot be performed at the surface.

The year-round variability in the vertical structure of  $K_{dp}$ ,  $Z_{DR}$  and  $Z_e$  can be described using a total of 26 profile classes; 10 and 16 in the presence and absence of ML, respectively. One of the main goals of this study was to associate profile classes with snow processes for their automated identification. It should be noted, though, that the profile classification is not based on expressly selected characteristics of radar fingerprints of the processes, but rather the general, complete structure of the  
415 profiles. Nevertheless, some profile classes seem to be strong indicators of specific processes or their combinations within the vertical profiles. From both classification models we can identify a total of 7 archetypes with the following characteristics:

1. Strong  $K_{dp}$  band in DGL, while  $Z_{DR}$  band is not pronounced. Deep precipitation system with homogeneous freezing at the cloud top. Associated with intensified dendritic growth leading to aggregation and high precipitation rate. (Classes R6, R9, S14, S15)
- 420 2.  $K_{dp}$  signature between DGL and 0 °C level possibly due to simultaneous occurrence of dendritic growth and secondary ice production. Homogeneous freezing at the cloud top. (R7, R8, S12)

3. High echo top, negligible  $K_{dp}$ , and  $Z_{DR} > 1$  dB, which decreases closer to the melting level due to aggregation. Typically,  $Z_e < 20$  dBZ. (R5, S11)
4. Cloud top between -30 and -20 °C level, with only a weak  $Z_{DR}$  band at -15 °C level. Moderate  $Z_e$  of roughly 20–30 dBZ, and weak  $K_{dp}$ . (R4, S9)
5. Strong  $Z_{DR}$  of typically more than 1.5 dB at the cloud top at around -15 °C level associated with growth of pristine planar crystals in low number concentrations. No  $K_{dp}$  is present, and low values of  $Z_e$  indicate the absence of aggregation. (R3, S5)
6. Echo detached from the surface due to snow particles either not having reached the surface yet or sublimating due to a dry layer. (R2, S3, S6, S8)
7. Weak or no  $Z_e$ . (R0, S0–S2)

In addition to these archetypes found in both summer and winter storms, there are S-classes representing situations where strong inversions interfere with snow processes. Notably, we found indications of dendritic growth in strong inversion layers, manifested as class S13. As the colder arctic air mass seldom occurs in Southern Finland,  $T_s < -10^\circ\text{C}$  can usually be attributed to a strong lower level inversion. Such inversions may have an important effect on the frequency of occurrence of some ice processes. Further, this implies that temperature information near the surface is necessary in order to determine whether a low altitude  $K_{dp}$  signature in the winter is an implication of the H-M process or dendritic growth.

Our approach to the classification problem is pronouncedly data-driven. This way, if the training material represents the climatology of ice processes and their radar signatures, as was the aim in this study, the resulting classes will reflect the statistical properties of this climatology. Hand picking the training material, on the other hand, would introduce human bias to the class boundaries.

However, there are possible drawbacks in the data-driven approach. The typical radar fingerprints of the H-M process were found to be much more scarce than those of dendritic growth, and often less pronounced. This negatively affects how the typical fingerprints of H-M process are represented in the classes. This could be enhanced by introducing a larger fraction of H-M profiles in the training data.

Another disadvantage in the data-driven approach is that covering a meaningful collection of unique fingerprints requires a large number of clusters, some of which do not represent unique microphysical processes. This problem may be mitigated to some extent by further optimizing the scaling of the radar variables such that the clustering would be less driven by differences in the intensities of the signatures in contrast to their shapes. Another way to address this issue is to simply combine classes that seem to represent the same processes, in like manner of the archetypes presented above. Reducing the number of classes by simply choosing a smaller  $k$  in the  $k$ -means clustering would reduce the amount of manual work involved in defining the class boundaries at the cost of decreased detail and accuracy in separating the processes. With a smaller  $k$ , the clustering would be driven by more general features of the profiles such as the overall shape and intensity of the polarimetric radar variables, whereas especially the typical characteristics of the H-M process fingerprints involve a higher level of detail.

455     The classification method presented in this study should be considered a starting point in studying vertical profiles of  
radar variables using unsupervised classification. As such, there is a vast range of potentially useful opportunities for further  
development of the method. The method is built on reasoned use of well known, proven algorithms such as PCA and  $k$ -means.  
We showed that this combination of machine learning algorithms allows both identification of known fingerprints and a  
more explorative approach in studying the characteristics of a regional climatology of precipitation processes. However, a  
460 comprehensive comparison of the numerous alternative algorithms is outside the scope of this study.

In the present classification method, ambient temperature is known only at the profile base. Compared to the use of full  
temperature profiles, this simplifies the method, and perhaps even more importantly, the requirements for the input data.  
However, future studies should investigate if the use of full temperature profiles allows more accurate separation of precipitation  
processes into different classes.

465     The unsupervised nature of the classification method is expected to allow extending its application to the detection of ice  
processes not covered in this study. Recently, Li et al. (2018) showed that certain combinations of  $Z_e$ ,  $Z_{DR}$ , and  $K_{dp}$  signatures  
can potentially be used for detecting heavy riming. Furthermore, the process is frequently observed in Finland, highlighting the  
potential of using an unsupervised method for its identification.

      The ability to describe a climatology of vertical structure of dual polarization radar variables and, further, precipitation pro-  
470 cesses using a finite number of classes has evident potential in improving quantitative precipitation estimation. We anticipate  
that automated detection of ice processes may allow the development of adaptive relation for snowfall rate  $S = S(Z_e)$ , in which  
the parameters could be chosen based on the profile classification result. Adaptive  $S(Z_e)$  relations, in turn, have potential in im-  
proving vertical profile of reflectivity correction methods. Future work will be devoted to investigating the use of unsupervised  
profile classification in such applications.

475 *Data availability.* The FMI radar and surface temperature data are available from the Finnish Meteorological Institute open data portal:  
<https://en.ilmatieteenlaitos.fi/open-data-sets-available>.

*Competing interests.* The authors declare that they have no conflict of interest.

*Acknowledgements.* We would like to thank the personnel of Hyytiälä station and Matti Leskinen for their support in field observation. The  
research of JT and DM was supported by the Academy of Finland Finnish Center of Excellence program (grant 307331). JT acknowledges  
480 the Doctoral Programme in Atmospheric Sciences (ATM-DP, University of Helsinki) for financial support.

## References

- Andrić, J., Kumjian, M. R., Zrnić, D. S., Straka, J. M., and Melnikov, V. M.: Polarimetric Signatures above the Melting Layer in Winter Storms: An Observational and Modeling Study, *J. Appl. Meteor. Climatol.*, 52, 682–700, <https://doi.org/10.1175/JAMC-D-12-028.1>, <http://journals.ametsoc.org/doi/abs/10.1175/JAMC-D-12-028.1>, 2013.
- 485 Arthur, D. and Vassilvitskii, S.: k-means++: The advantages of careful seeding, pp. 1027–1035, Society for Industrial and Applied Mathematics, 2007.
- Bechini, R. and Chandrasekar, V.: A Semisupervised Robust Hydrometeor Classification Method for Dual-Polarization Radar Applications, *Journal of Atmospheric and Oceanic Technology*, 32, 22–47, <https://doi.org/10.1175/JTECH-D-14-00097.1>, <http://journals.ametsoc.org/doi/10.1175/JTECH-D-14-00097.1>, 2015.
- 490 Bechini, R., Baldini, L., and Chandrasekar, V.: Polarimetric Radar Observations in the Ice Region of Precipitating Clouds at C-Band and X-Band Radar Frequencies, *J. Appl. Meteor. Climatol.*, 52, 1147–1169, <https://doi.org/10.1175/JAMC-D-12-055.1>, <http://journals.ametsoc.org/doi/abs/10.1175/JAMC-D-12-055.1>, 2013.
- Cattell, R. B.: The Scree Test For The Number Of Factors, *Multivariate Behavioral Research*, 1, 245–276, 1966.
- Chandrasekar, V., Keränen, R., Lim, S., and Moisseev, D.: Recent advances in classification of observations from dual polarization  
495 weather radars, *Atmospheric Research*, 119, 97–111, <https://doi.org/10.1016/j.atmosres.2011.08.014>, <http://www.sciencedirect.com/science/article/pii/S0169809511002821>, 2013.
- Field, P. R. and Heymsfield, A. J.: Importance of snow to global precipitation: IMPORTANCE OF SNOW TO PRECIPITATION, *Geophys. Res. Lett.*, 42, 9512–9520, <https://doi.org/10.1002/2015GL065497>, <http://doi.wiley.com/10.1002/2015GL065497>, 2015.
- Field, P. R., Lawson, R. P., Brown, P. R. A., Lloyd, G., Westbrook, C., Moisseev, D., Miltenberger, A., Nenes, A., Blyth, A., Choularton, T., Connolly, P., Buehl, J., Crosier, J., Cui, Z., Dearden, C., DeMott, P., Flossmann, A., Heymsfield, A., Huang, Y., Kalesse, H., Kanji, Z. A., Korolev, A., Kirchgaessner, A., Lasher-Trapp, S., Leisner, T., McFarquhar, G., Phillips, V., Stith, J., and Sullivan, S.: Chapter 7. Secondary Ice Production - current state of the science and recommendations for the future, *Meteorological Monographs*, pp. AMSMONOGRAPHS–D–16–0014.1, <https://doi.org/10.1175/AMSMONOGRAPHS-D-16-0014.1>, <http://journals.ametsoc.org/doi/10.1175/AMSMONOGRAPHS-D-16-0014.1>, 2016.
- 500 Giangrande, S. E., Toto, T., Bansemer, A., Kumjian, M. R., Mishra, S., and Ryzhkov, A. V.: Insights into riming and aggregation processes as revealed by aircraft, radar, and disdrometer observations for a 27 April 2011 widespread precipitation event: Insights into Riming and Aggregation, *J. Geophys. Res. Atmos.*, 121, 5846–5863, <https://doi.org/10.1002/2015JD024537>, <http://doi.wiley.com/10.1002/2015JD024537>, 2016.
- Grazioli, J., Lloyd, G., Panziera, L., Hoyle, C. R., Connolly, P. J., Henneberger, J., and Berne, A.: Polarimetric radar and in situ observations of  
510 riming and snowfall microphysics during CLACE 2014, *Atmos. Chem. Phys.*, 15, 13 787–13 802, <https://doi.org/10.5194/acp-15-13787-2015>, <https://www.atmos-chem-phys.net/15/13787/2015/>, 2015a.
- Grazioli, J., Tuia, D., and Berne, A.: Hydrometeor classification from polarimetric radar measurements: a clustering approach, *Atmos. Meas. Tech.*, 8, 149–170, <https://doi.org/10.5194/amt-8-149-2015>, <https://www.atmos-meas-tech.net/8/149/2015/>, 2015b.
- Griffin, E. M., Schuur, T. J., and Ryzhkov, A. V.: A Polarimetric Analysis of Ice Microphysical Processes in Snow, Using Quasi-Vertical Profiles, *Journal of Applied Meteorology and Climatology*, 57, 31–50, <https://doi.org/10.1175/JAMC-D-17-0033.1>, <http://journals.ametsoc.org/doi/10.1175/JAMC-D-17-0033.1>, 2018.
- 515

- Hallett, J. and Mossop, S. C.: Production of secondary ice particles during the riming process, *Nature*, 249, 26–28, <https://doi.org/10.1038/249026a0>, <https://doi.org/10.1038/249026a0>, 1974.
- Helmus, J. J. and Collis, S. M.: The Python ARM Radar Toolkit (Py-ART), a Library for Working with Weather Radar Data in the Python Programming Language, *Journal of Open Research Software*, 4, <https://doi.org/10.5334/jors.119>, <http://openresearchsoftware.metajnl.com/articles/10.5334/jors.119/>, 2016.
- Jones, E., Oliphant, T., Peterson, P., et al.: *SciPy: Open source scientific tools for Python (Version 1.3)* [computer software], <https://www.scipy.org/>, [Online; accessed 2019-10-04], 2019.
- Juga, I., Hippi, M., Moiseev, D., and Saltikoff, E.: Analysis of weather factors responsible for the traffic ‘Black Day’ in Helsinki, Finland, on 17 March 2005, *Met. Apps*, 19, 1–9, <https://doi.org/10.1002/met.238>, <http://doi.wiley.com/10.1002/met.238>, 2012.
- Kennedy, P. C. and Rutledge, S. A.: S-Band Dual-Polarization Radar Observations of Winter Storms, *J. Appl. Meteor. Climatol.*, 50, 844–858, <https://doi.org/10.1175/2010JAMC2558.1>, <https://doi.org/10.1175/2010JAMC2558.1>, 2011.
- Kneifel, S., von Lerber, A., Tiira, J., Moiseev, D., Kollias, P., and Leinonen, J.: Observed relations between snowfall microphysics and triple-frequency radar measurements: Triple Frequency Signatures of Snowfall, *Journal of Geophysical Research: Atmospheres*, <https://doi.org/10.1002/2015JD023156>, <http://doi.wiley.com/10.1002/2015JD023156>, 2015.
- Kumjian, M. R. and Lombardo, K. A.: Insights into the Evolving Microphysical and Kinematic Structure of Northeastern U.S. Winter Storms from Dual-Polarization Doppler Radar, *Monthly Weather Review*, 145, 1033–1061, <https://doi.org/10.1175/MWR-D-15-0451.1>, <http://journals.ametsoc.org/doi/10.1175/MWR-D-15-0451.1>, 2017.
- Kumjian, M. R., Rutledge, S. A., Rasmussen, R. M., Kennedy, P. C., and Dixon, M.: High-Resolution Polarimetric Radar Observations of Snow-Generating Cells, *J. Appl. Meteor. Climatol.*, 53, 1636–1658, <https://doi.org/10.1175/JAMC-D-13-0312.1>, <http://journals.ametsoc.org/doi/abs/10.1175/JAMC-D-13-0312.1>, 2014.
- Kumjian, M. R., Mishra, S., Giangrande, S. E., Toto, T., Ryzhkov, A. V., and Bansemer, A.: Polarimetric radar and aircraft observations of saggy bright bands during MC3E: SAGGY BRIGHT BANDS, *J. Geophys. Res. Atmos.*, 121, 3584–3607, <https://doi.org/10.1002/2015JD024446>, <http://doi.wiley.com/10.1002/2015JD024446>, 2016.
- Li, H., Moiseev, D., and von Lerber, A.: How Does Riming Affect Dual-Polarization Radar Observations and Snowflake Shape?, *J. Geophys. Res. Atmos.*, 123, 6070–6081, <https://doi.org/10.1029/2017JD028186>, <http://doi.wiley.com/10.1029/2017JD028186>, 2018.
- Lloyd, S.: Least squares quantization in PCM, *IEEE Transactions on Information Theory*, 28, 129–137, <https://doi.org/10.1109/TIT.1982.1056489>, <http://ieeexplore.ieee.org/document/1056489/>, 1982.
- Maesaka, T., Iwanami, K., and Maki, M.: Non-negative K DP estimation by monotone increasing  $\Phi$  DP assumption below melting layer, in: Extended Abstracts, Seventh European Conf. on Radar in Meteorology and Hydrology, 2012.
- Moiseev, D. N., Lautaportti, S., Tyynela, J., and Lim, S.: Dual-polarization radar signatures in snowstorms: Role of snowflake aggregation, *J. Geophys. Res. Atmos.*, 120, 12 644–12 655, <https://doi.org/10.1002/2015jd023884>, 2015.
- Oue, M., Galletti, M., Verlinde, J., Ryzhkov, A., and Lu, Y.: Use of X-Band Differential Reflectivity Measurements to Study Shallow Arctic Mixed-Phase Clouds, *J. Appl. Meteor. Climatol.*, 55, 403–424, <https://doi.org/10.1175/JAMC-D-15-0168.1>, <http://journals.ametsoc.org/doi/10.1175/JAMC-D-15-0168.1>, 2016.
- Oue, M., Kollias, P., Ryzhkov, A., and Luke, E. P.: Toward Exploring the Synergy Between Cloud Radar Polarimetry and Doppler Spectral Analysis in Deep Cold Precipitating Systems in the Arctic, *J. Geophys. Res. Atmos.*, 123, 2797–2815, <https://doi.org/10.1002/2017JD027717>, <http://doi.wiley.com/10.1002/2017JD027717>, 2018.

- Petäjä, T., O'Connor, E. J., Moiseev, D., Sinclair, V. A., Manninen, A. J., Väänänen, R., von Lerber, A., Thornton, J. A., Nicoll, K., Petersen, W., Chandrasekar, V., Smith, J. N., Winkler, P. M., Krüger, O., Hakola, H., Timonen, H., Brus, D., Laurila, T., Asmi, E., Riekkola, M.-L., Mona, L., Massoli, P., Engelmann, R., Komppula, M., Wang, J., Kuang, C., Bäck, J., Virtanen, A., Levula, J., Ritsche, M., and Hickmon, N.: BAECC A field campaign to elucidate the impact of Biogenic Aerosols on Clouds and Climate, *Bull. Amer. Meteor. Soc.*, <https://doi.org/10.1175/BAMS-D-14-00199.1>, <http://dx.doi.org/10.1175/BAMS-D-14-00199.1>, 2016.
- Raykov, Y. P., Boukouvalas, A., Baig, F., and Little, M. A.: What to Do When K-Means Clustering Fails: A Simple yet Principled Alternative Algorithm, *PLOS ONE*, 11, e0162259, <https://doi.org/10.1371/journal.pone.0162259>, <https://dx.plos.org/10.1371/journal.pone.0162259>, 2016.
- Rousseeuw, P. J.: Silhouettes: A graphical aid to the interpretation and validation of cluster analysis, *Journal of Computational and Applied Mathematics*, 20, 53–65, [https://doi.org/10.1016/0377-0427\(87\)90125-7](https://doi.org/10.1016/0377-0427(87)90125-7), <http://linkinghub.elsevier.com/retrieve/pii/0377042787901257>, 1987.
- Schneebeli, M., Dawes, N., Lehning, M., and Berne, A.: High-Resolution Vertical Profiles of X-Band Polarimetric Radar Observables during Snowfall in the Swiss Alps, *J. Appl. Meteor. Climatol.*, 52, 378–394, <https://doi.org/10.1175/JAMC-D-12-015.1>, <http://journals.ametsoc.org/doi/abs/10.1175/JAMC-D-12-015.1>, 2013.
- Schrom, R. S., Kumjian, M. R., and Lu, Y.: Polarimetric Radar Signatures of Dendritic Growth Zones within Colorado Winter Storms, *J. Appl. Meteor. Climatol.*, 54, 2365–2388, <https://doi.org/10.1175/JAMC-D-15-0004.1>, <http://journals.ametsoc.org/doi/10.1175/JAMC-D-15-0004.1>, 2015.
- Sinclair, V. A., Moiseev, D., and von Lerber, A.: How dual-polarization radar observations can be used to verify model representation of secondary ice, *Journal of Geophysical Research: Atmospheres*, 121, 10,954–10,970, <https://doi.org/10.1002/2016JD025381>, <https://agupubs.onlinelibrary.wiley.com/doi/abs/10.1002/2016JD025381>, 2016.
- Thompson, E. J., Rutledge, S. A., Dolan, B., Chandrasekar, V., and Cheong, B. L.: A Dual-Polarization Radar Hydrometeor Classification Algorithm for Winter Precipitation, *J. Atmos. Oceanic Technol.*, 31, 1457–1481, <https://doi.org/10.1175/JTECH-D-13-00119.1>, <https://doi.org/10.1175/JTECH-D-13-00119.1>, 2014.
- Trömel, S., Ryzhkov, A. V., Zhang, P., and Simmer, C.: Investigations of Backscatter Differential Phase in the Melting Layer, *J. Appl. Meteor. Climatol.*, 53, 2344–2359, <https://doi.org/10.1175/JAMC-D-14-0050.1>, <http://journals.ametsoc.org/doi/abs/10.1175/JAMC-D-14-0050.1>, 2014.
- von Lerber, A., Moiseev, D., Bliven, L. F., Petersen, W., Harri, A.-M., and Chandrasekar, V.: Microphysical Properties of Snow and Their Link to Ze–S Relations during BAECC 2014, *J. Appl. Meteor. Climatol.*, 56, 1561–1582, <https://doi.org/10.1175/JAMC-D-16-0379.1>, <https://doi.org/10.1175/JAMC-D-16-0379.1>, 2017.
- Williams, E. R., Smalley, D. J., Donovan, M. F., Hallowell, R. G., Hood, K. T., Bennett, B. J., Evaristo, R., Stepanek, A., Bals-Elsholz, T., Cobb, J., Ritzman, J., Korolev, A., and Wolde, M.: Measurements of Differential Reflectivity in Snowstorms and Warm Season Stratiform Systems, *J. Appl. Meteor. Climatol.*, 54, 573–595, <https://doi.org/10.1175/JAMC-D-14-0020.1>, <http://journals.ametsoc.org/doi/10.1175/JAMC-D-14-0020.1>, 2015.
- Wolfensberger, D., Scipion, D., and Berne, A.: Detection and characterization of the melting layer based on polarimetric radar scans, *Q.J.R. Meteorol. Soc.*, 142, 108–124, <https://doi.org/10.1002/qj.2672>, 2015.
